# Supplementary material
Source: HighWire-hosted journal article supplement (https://www.annfammed.org/highwire/filestream/27027/field_highwire_adjunct_files/0/Moschogianis_VA.pdf)
Supplement: Moschogianis_VA.pdf [file Moschogianis_VA.pdf]

# Seven Ways AI Could Improve eVisits in Primary Care

In this qualitative study, researchers explored patient and staff views on the use of and opportunities for AI during eVisits.

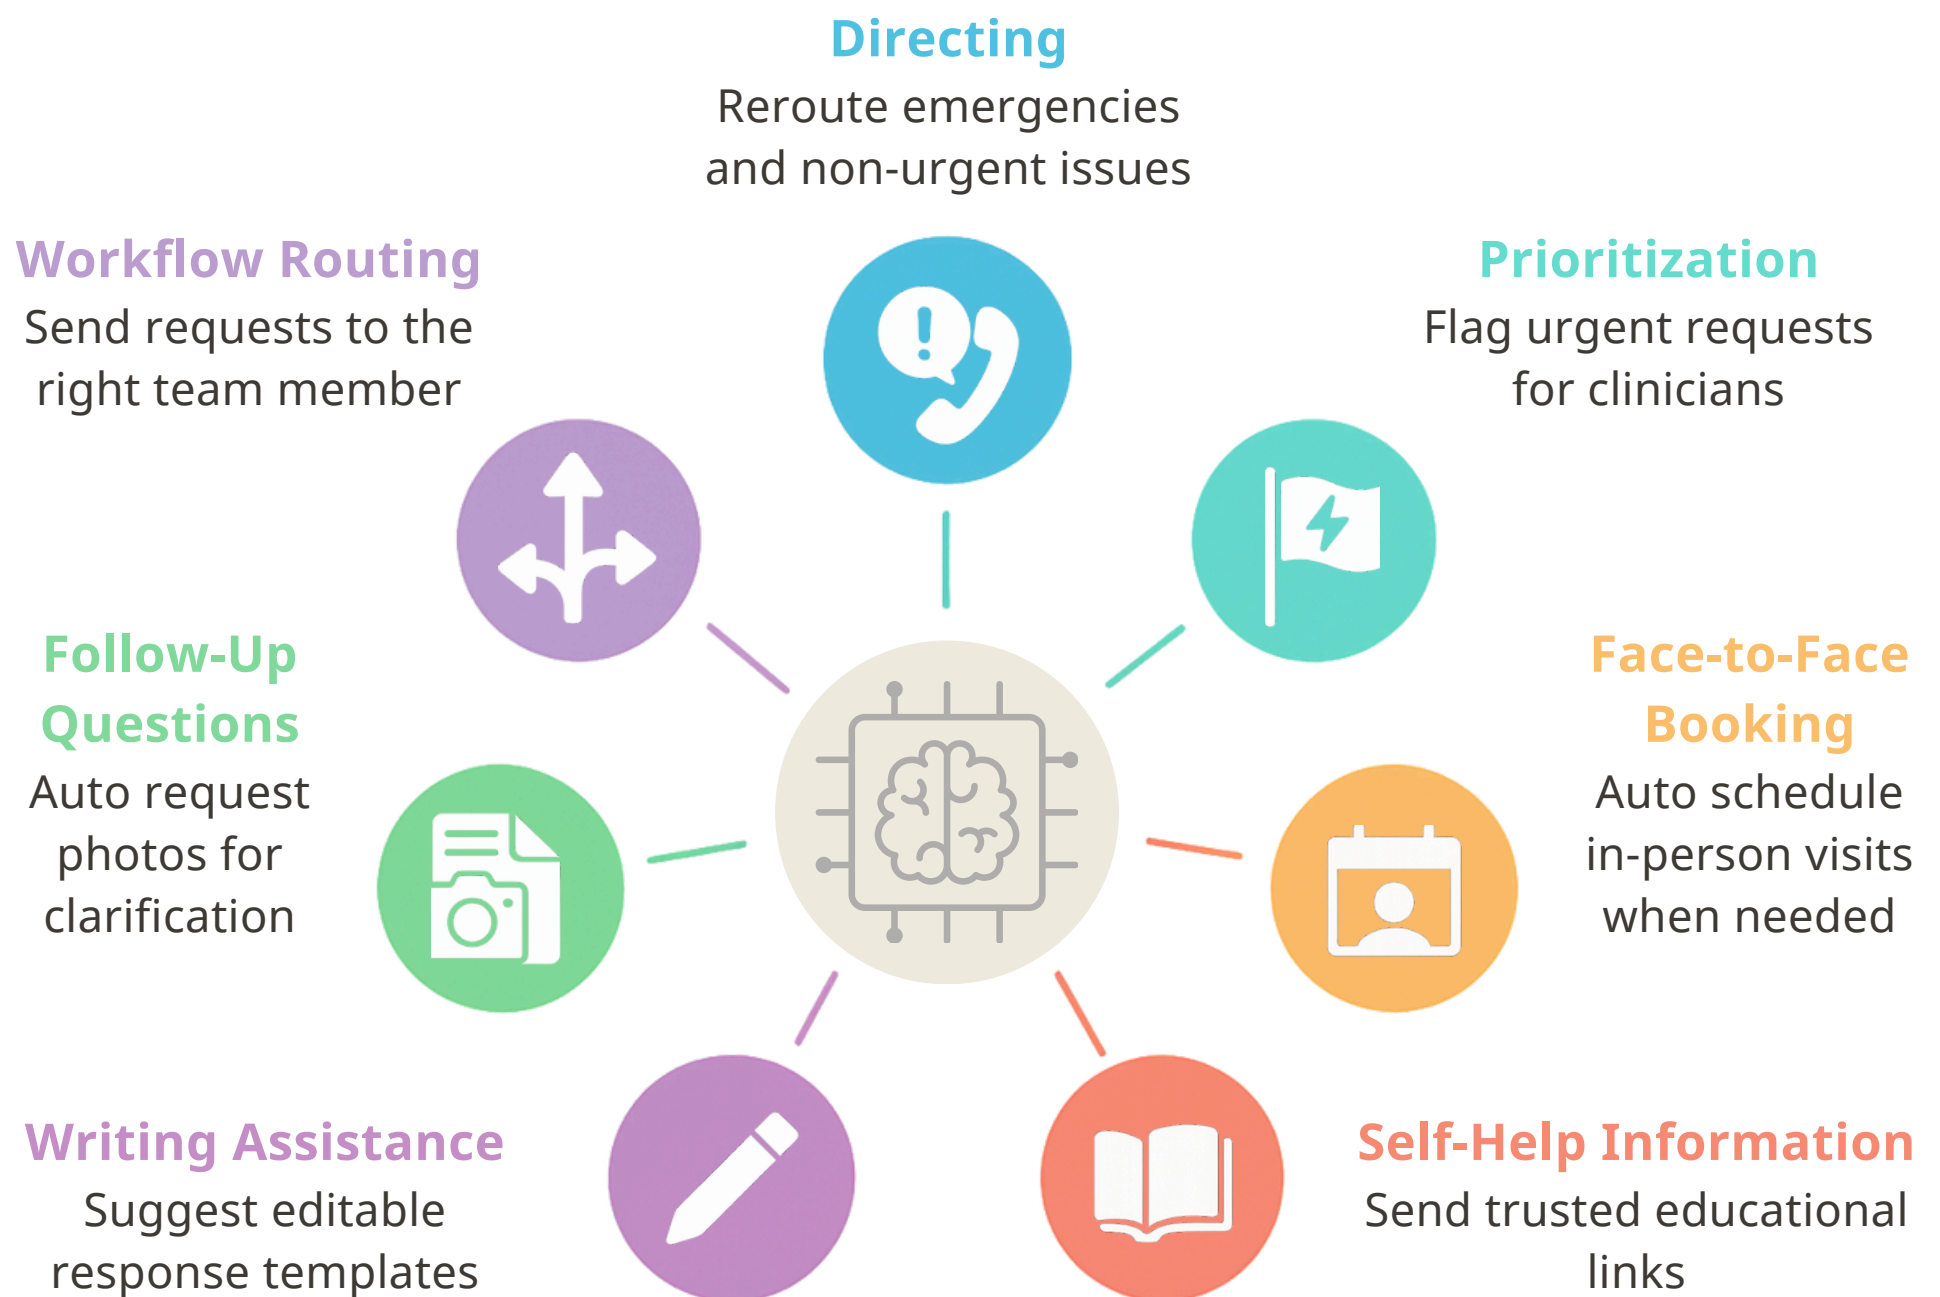

**Source:** Moschogianis S, Darley S, Coulson T, et al. Seven opportunities for artificial intelligence in primary care electronic visits: qualitative study of staff and patient views. *Ann Fam Med*. 2025;23:10.1370/afm.240292
